# Supplementary material
Source: publisher figshare collection journal article supplement (https://acs.figshare.com/ndownloader/files/5193925)
Supplement: Supplementary file 1 [file 5193925]

## Supplemental Data

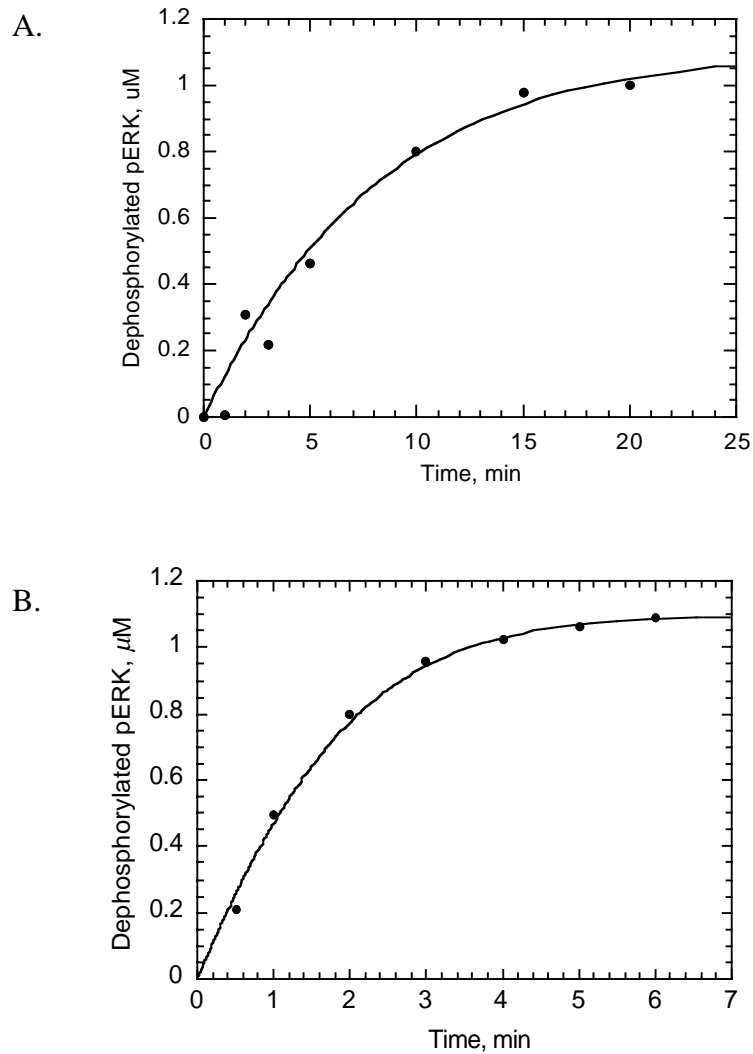

**Figure 1. Time-dependent dephosphorylation of pERK by VHR and the MKP3/VHR chimera using a radioactive kinase assay.** VHR (A) and MKP3/VHR chimera (B) (0.1  $\mu$ M) were combined with 1  $\mu$ M pERK and incubated for up to 20 min at 25 °C. Aliquots were withdrawn at the indicated times and ERK kinase assays were performed as described in Materials and Methods. The data were fitted to the integrated Michaelis-Menten equation (Eq. 2). The graph is an average of three different experiments.

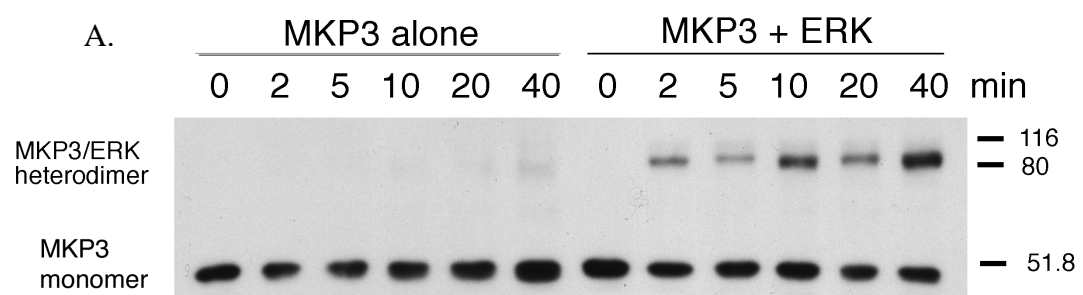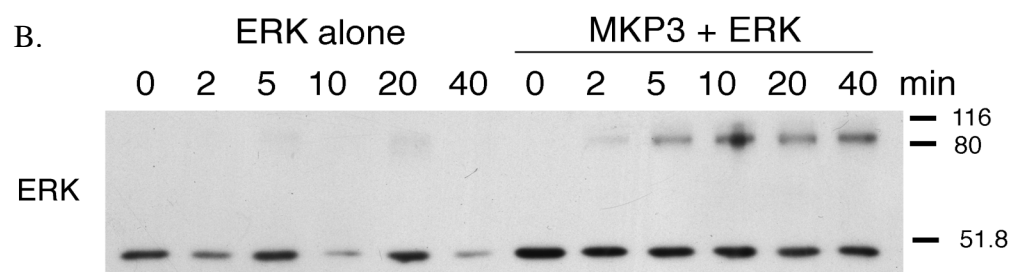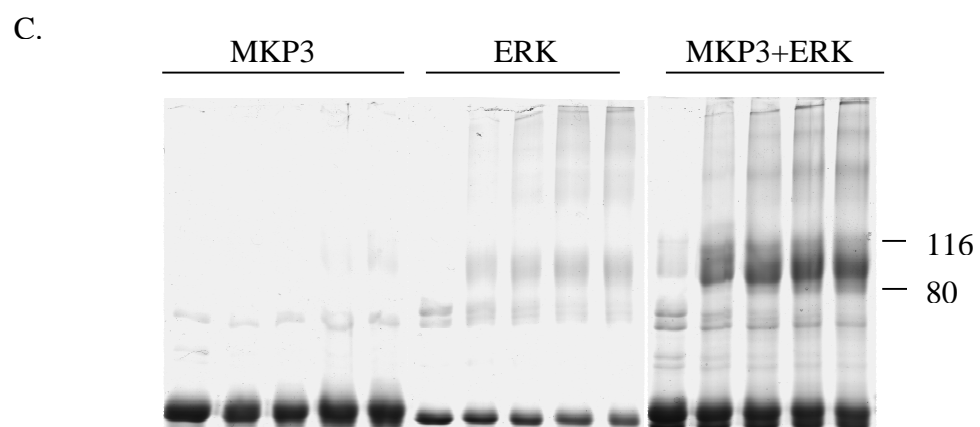

**Figure 2. Glutaraldehyde cross-linking of MKP3, ERK and the mixture of MKP3 and ERK.** (A-B) MKP3 (8  $\mu$ M), ERK (8  $\mu$ M), or 1:1 mixture of MKP3 and ERK (8  $\mu$ M each) were cross-linked with 5 mM glutaraldehyde up to 15 min at 25 °C. The reactions were terminated by adding glycine (pH 9.0) at a final concentration of 0.2 mM. The cross-linked species were determined with SDS-PAGE and western blotting with appropriate antibodies. (C) Coomassie staining of SDS-PAGE of cross-linked species.

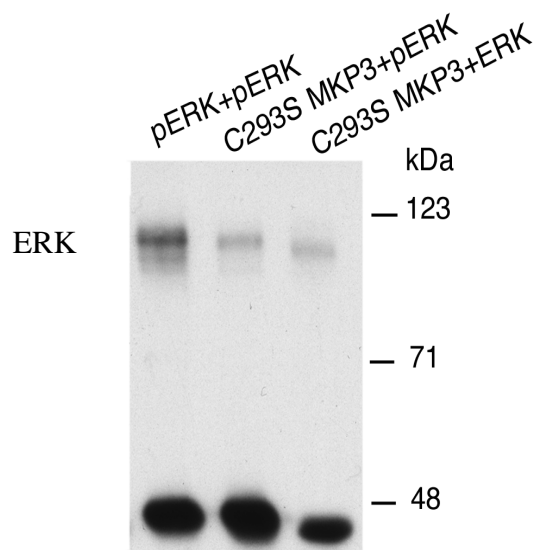

**Figure 3. Mobility differences in cross-linked species.** ERK-MKP3, pERK-pERK, ERK-pERK cross-linked species were separated by SDS-PAGE and probed with antibody (polyclonal) that recognizes ERK.
